# Supplementary material for: Engineering of metal-free bipyridine-based bridged silsesquioxanes for sustainable solid-state lighting
Source: Royal Society of Chemistry journal article supplement (doi:10.1039/c2jm15225h), 2012-01-01

## Supplementary Information

### Engineering of metal-free bipyridine-based bridged silsesquioxanes for sustainable solid-state lighting

Julien Graffion<sup>1,2</sup>, Xavier Cattoën<sup>2</sup>, Vânia T. Freitas<sup>1</sup>, Rute A. S. Ferreira<sup>1</sup>, Michel Wong Chi Man<sup>2\*</sup>, Luís D. Carlos,<sup>1\*</sup>

<sup>1</sup>Physics Department and CICECO, University of Aveiro, 3810-193 Aveiro, Portugal.

<sup>2</sup>Institut Charles Gerhardt Montpellier, UMR 5253 CNRS-UM2-ENSCM-UM1, 34296 Montpellier, France.

---

#### Table and Figure captions

**Table S1.** Elemental composition (in %<sub>w</sub>) and calculated molar ratios for **M5** and **M6**.

The values indicated in parentheses indicate the theoretical ratio. The experimental errors are ±0.3% (absolute) for nitrogen and ±2% (relative error) for silicon.

**Figure S1.** FTIR spectra of **M5** and **M6**.

**Figure S2.** <sup>29</sup>Si solid-state CP-MAS NMR spectra of **M5** and **M6**. The dotted line represents the fit using Gaussian functions in green solid lines.

**Figure S3.** <sup>13</sup>C CP-MAS solid-state NMR spectra of **M5** and **M6** and <sup>13</sup>C NMR of **P5** and **P6** in solution (DMSO-d<sub>6</sub>). The asterisk and the paragraph symbol (§) correspond to the solvent (DMSO) and the carbon atoms of residual ethoxy groups, respectively.

**Figure S4.** XRD patterns of **M5** and **M6**.

**Figure S5.** Thermogravimetric analysis of **M6**.

**Figure S6.** Excitation spectra of (a) **M6** and (b) **M5** monitored at 430 nm, 460 nm, 480/490 nm and 520 nm.

**Table S1**

| <b>Hybrid</b> | <b>%N</b> | <b>%Si</b> | <b>N/Si</b> |
|---------------|-----------|------------|-------------|
| <b>M5</b>     | 16.26     | 11.62      | 2.8 (3.0)   |
| <b>M6</b>     | 16.92     | 10.92      | 3.1 (3.0)   |

**Figure S1**

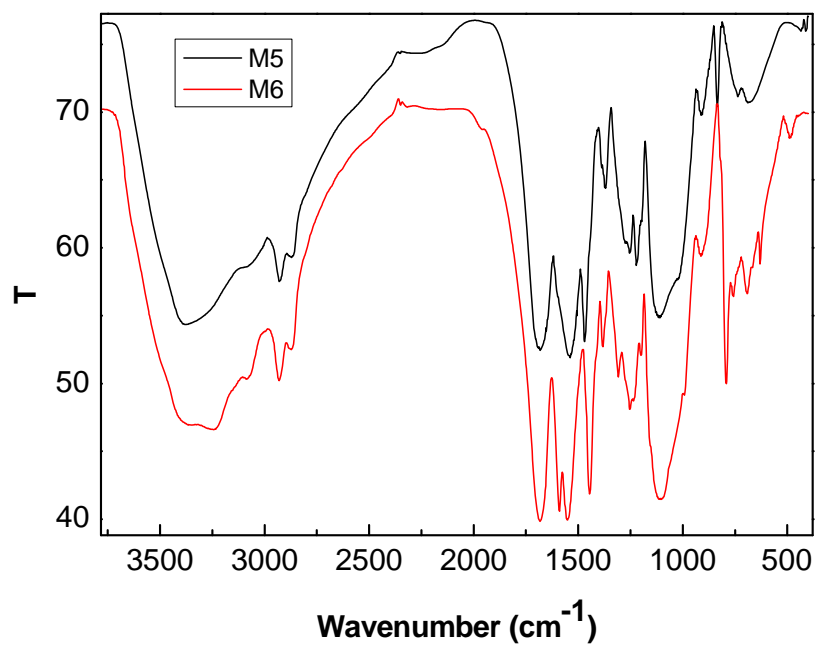

Figure S2

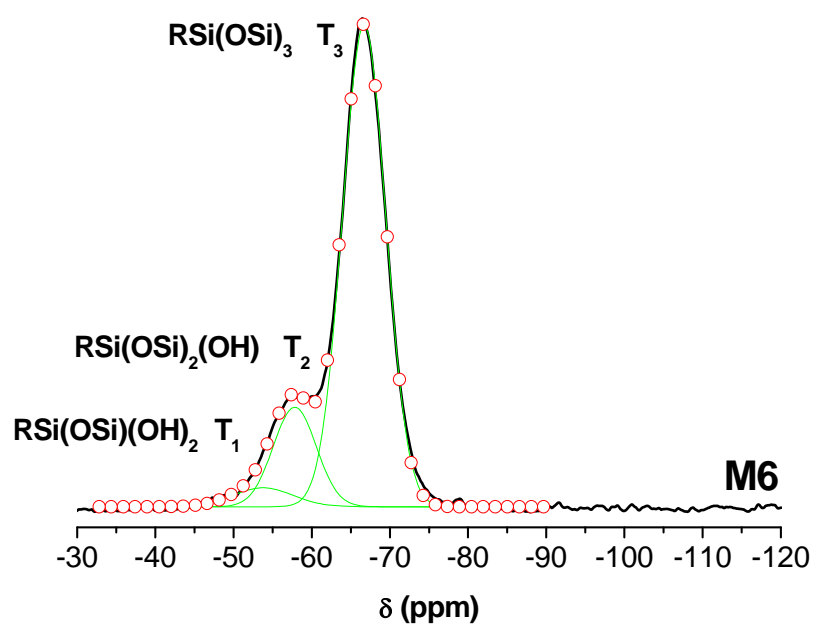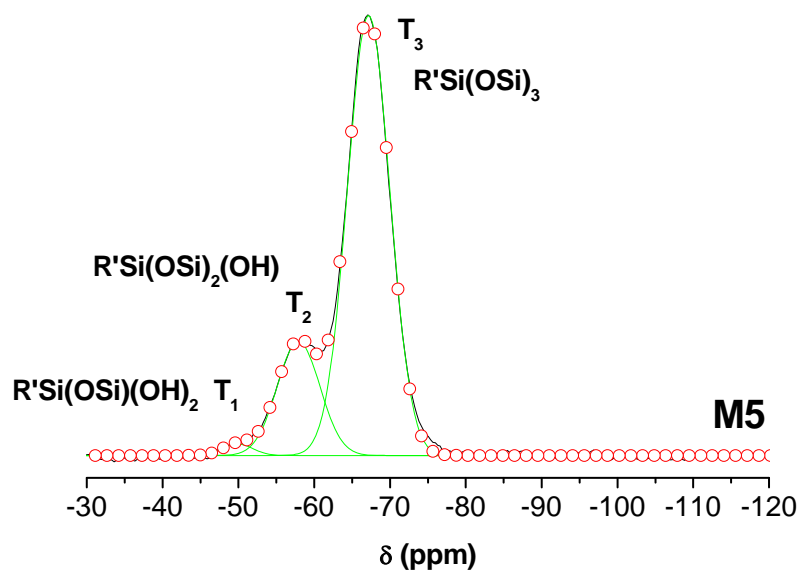

Figure S3

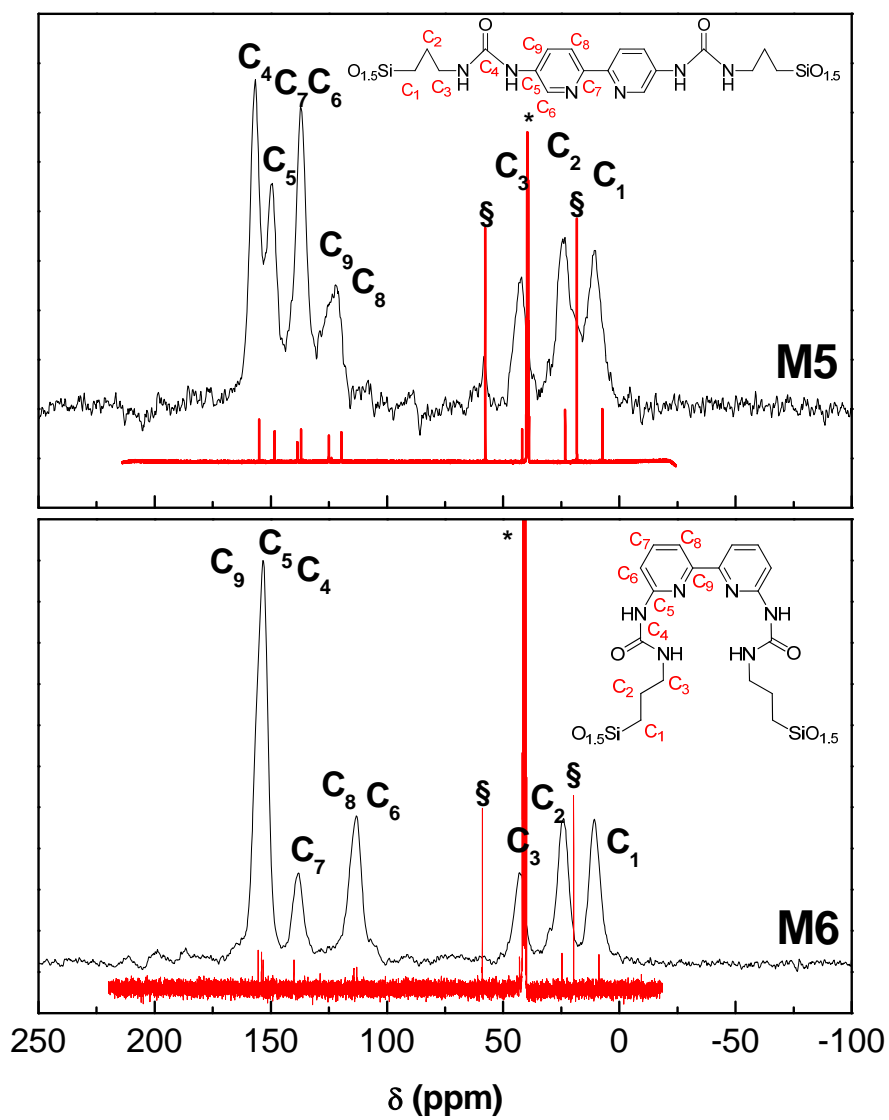

**Figure S4**

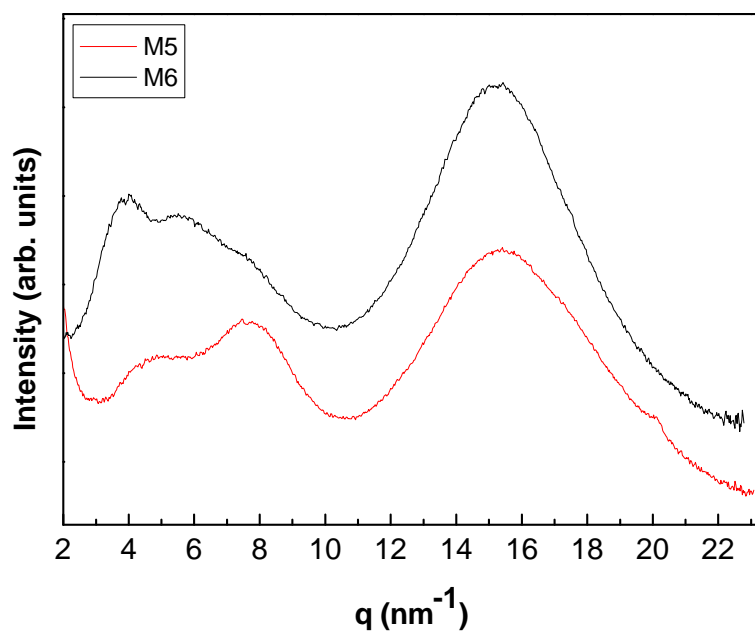

**Figure S5**

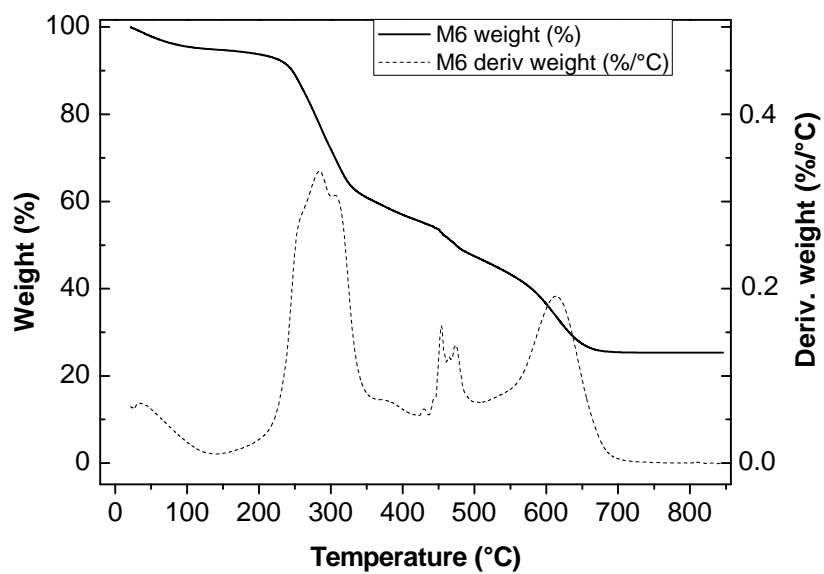

**Figure S6**

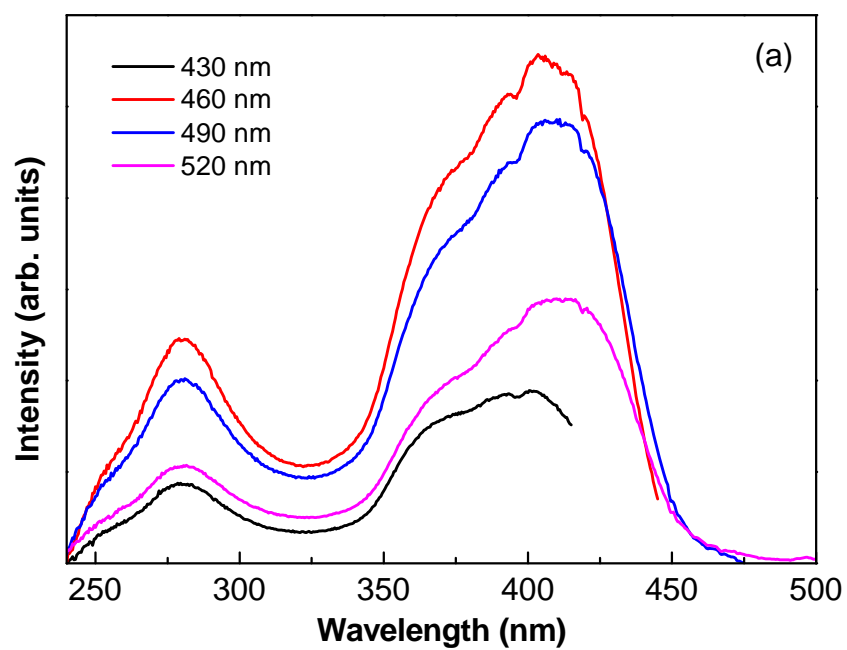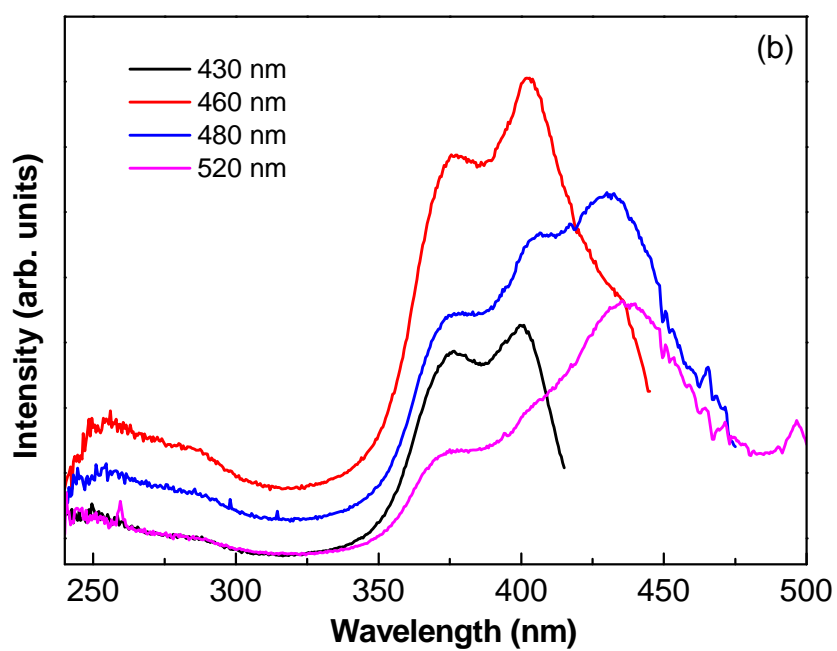

Supplement: c2jm15225h.pdf [file c2jm15225h.pdf]
